# Supplementary material
Source: ML conference proceedings conference paper supplement (https://proceedings.neurips.cc/paper_files/paper/2019/hash/688f3fe72241429902623b790f15a774-Abstract.html)
Supplement: Supplementary file [file 688f3fe72241429902623b790f15a774-Supplemental.zip]

---

# Supplementary material for Structured Variational Inference in Continuous Cox Process Models

---

**Virginia Aglietti**  
University of Warwick  
The Alan Turing Institute  
V.Aglietti@warwick.ac.uk

**Edwin V. Bonilla**  
CSIRO's Data61  
Edwin.Bonilla@data61.csiro.au

**Theodoros Damoulas**  
University of Warwick  
The Alan Turing Institute  
T.Damoulas@warwick.ac.uk

**Sally Cripps**  
Centre for Translational Data Science  
The University of Sydney  
Sally.Cripps@sydney.edu.au

## 1 ELBO derivations

Here we derive the expressions given in Eqs. (7)-(10). As given in Eq. (7) the evidence lower bound ( $\mathcal{L}_{\text{elbo}}$ ) decomposes as:

$$\begin{aligned}
 \mathcal{L}_{\text{elbo}} &= \mathbb{E}_Q \left[ \log \left[ \frac{p(\{\mathbf{x}_n\}_{n=1}^N, \{\mathbf{x}_m\}_{m=1}^M, M, \mathbf{f}, \mathbf{u}, \lambda^* | \tau, \boldsymbol{\theta})}{p(\mathbf{f} | \mathbf{u}) q(\{\mathbf{x}_m\}_{m=1}^M | M) q(M | \mathbf{f}, \lambda^*) q(\mathbf{u}) q(\lambda^*)} \right] \right] \\
 &= \mathbb{E}_Q [\log p(\{\mathbf{x}_n\}_{n=1}^N, \{\mathbf{x}_m\}_{m=1}^M, M, \mathbf{u}, \lambda^* | \tau, \boldsymbol{\theta})] - \mathbb{E}_Q [\log q(\{\mathbf{x}_m\}_{m=1}^M | M) q(M | \mathbf{f}, \lambda^*) q(\mathbf{u}) q(\lambda^*)] \\
 &= \mathbb{E}_Q \left[ (N + M) \log(\lambda^*) - \lambda^* \mu(\tau) - \log(M!) - \log(N!) + \sum_{n=1}^N \log(\sigma(f(\mathbf{x}_n))) \right] \\
 &\quad + \mathbb{E}_Q \left[ \sum_{m=1}^M \log(\sigma(-f(\mathbf{x}_m))) + \log(p(\mathbf{u})) + \log(p(\lambda^*)) \right] \\
 &\quad - \mathbb{E}_Q [\log(q(\mathbf{u})) - \log(q(M | \mathbf{f}, \lambda^*)) - \log(q(\lambda^*)) - \log(q(\{\mathbf{x}_m\}_{m=1}^M | M))] \\
 &= N(\psi(\alpha) - \log(\beta)) - V \frac{\alpha}{\beta} - \log(\log N!) + \underbrace{\mathbb{E}_Q[M \log(\lambda^*)]}_{T_1} - \underbrace{\mathbb{E}_Q[\log M!]}_{T_2} + \\
 &\quad + \sum_{n=1}^N \mathbb{E}_{q(\mathbf{u})} [\log(\sigma(f(\mathbf{x}_n)))] + \underbrace{\mathbb{E}_Q \left[ \sum_{m=1}^M \log(\sigma(-f(\mathbf{x}_m))) \right]}_{T_3} + \\
 &\quad - KL(q(\mathbf{u}) || p(\mathbf{u})) - KL(q(\lambda^*) || p(\lambda^*)) \\
 &\quad - \underbrace{\mathbb{E}_Q[\log q(M | \mathbf{f}, \lambda^*)]}_{T_4} - \underbrace{\mathbb{E}_Q[\log q(\{\mathbf{x}_m\}_{m=1}^M | M)]}_{T_5}
 \end{aligned}$$

Let's now focus on the terms  $T_i, i = 1, \dots, 5$ .

The term  $T_1$  (Eq. (8)) is given by:

$$\begin{aligned}
T_1 &= \mathbb{E}_{q(\mathbf{u})q(\lambda^*)} [\mathbb{E}_{q(M|\mathbf{u},\lambda^*)} [M \log(\lambda^*)]] \\
&= \mathbb{E}_{q(\mathbf{u})q(\lambda^*)} [\log(\lambda^*) \mathbb{E}_{q(M|\mathbf{u},\lambda^*)} [M]] \\
&= \mathbb{E}_{q(\mathbf{u})q(\lambda^*)} \left[ \log(\lambda^*) \lambda^* \int_{\mathcal{X}} \sigma(-f(\mathbf{x})) d\mathbf{x} \right] \\
&= \mathbb{E}_{q(\lambda^*)} [\lambda^* \log(\lambda^*)] \mathbb{E}_{q(\mathbf{f})} [\mu(\mathbf{f})]
\end{aligned}$$

The term  $T_3$  (Eq. (9)) is given by:

$$\begin{aligned}
T_3 &= \mathbb{E}_{q(\mathbf{f})q(\mathbf{y}_m)q(\lambda^*)} \left[ \mathbb{E}_{q(M|\mathbf{f},\mathbf{y}_m,\lambda^*)} \left[ \sum_{m=1}^M \log(\sigma(-f(\mathbf{y}_m))) \right] \right] \\
&= \mathbb{E}_{q(\mathbf{f})q(\mathbf{y}_m)q(\lambda^*)} \left[ \log(\sigma(-f(\mathbf{y}_m))) \mathbb{E}_{q(M|\mathbf{f},\lambda^*)} \left[ \sum_{m=1}^M 1 \right] \right] \\
&= \mathbb{E}_{q(\mathbf{f})q(\mathbf{y}_m)q(\lambda^*)} [\log(\sigma(-f(\mathbf{y}_m))) \lambda^* \mu(\mathbf{f})] \\
&= \frac{\alpha}{\beta} \mathbb{E}_{q(\mathbf{f})} [\mu(\mathbf{f})] \mathbb{E}_{q(\mathbf{f})q(\mathbf{y}_m)} [\log(\sigma(-f(\mathbf{y}_m)))]
\end{aligned}$$

The term  $T_4$  (Eq. (10)) is given by:

$$\begin{aligned}
T_4 &= \mathbb{E}_Q [-\lambda^* \mu(\mathbf{f})] + \mathbb{E}_Q [M \log(\lambda^* \mu(\mathbf{f}))] - \mathbb{E}_Q [\log M!] \\
&= -\frac{\alpha}{\beta} \mathbb{E}_{q(\mathbf{f})} [\mu(\mathbf{f})] + \mathbb{E}_{q(\lambda^*)q(\mathbf{f})} [\lambda^* \log(\lambda^*) \mu(\mathbf{f}) + \lambda^* \mu(\mathbf{f}) \log(\mu(\mathbf{f}))] - \mathbb{E}_Q [\log M!] \\
&= -\frac{\alpha}{\beta} \mathbb{E}_{q(\mathbf{f})} [\mu(\mathbf{f})] + \mathbb{E}_{q(\lambda^*)} [\lambda^* \log(\lambda^*)] \mathbb{E}_{q(\mathbf{f})} [\mu(\mathbf{f})] + \frac{\alpha}{\beta} \mathbb{E}_{q(\mathbf{f})} [\mu(\mathbf{f}) \log(\mu(\mathbf{f}))] - \mathbb{E}_Q [\log(M!)]
\end{aligned}$$

Finally, the term  $T_5$  (Eq. (9)) is given by:

$$\begin{aligned}
T_5 &= \mathbb{E}_Q \left[ \sum_{m=1}^M \log q(\mathbf{y}_m) \right] \\
&= \mathbb{E}_{q(\mathbf{f},\lambda^*,M)} \left[ \sum_{m=1}^M \mathbb{E}_{q(\mathbf{y}_m)} [\log q(\mathbf{y}_m)] \right] \\
&= \mathbb{E}_{q(\mathbf{f},\lambda^*,M)} [M] \mathbb{E}_{q(\mathbf{y}_m)} [\log q(\mathbf{y}_m)] \\
&= \mathbb{E}_{q(\mathbf{f})q(\lambda^*)} [\lambda^* \mu(\mathbf{f})] \mathbb{E}_{q(\mathbf{y}_m)} [\log q(\mathbf{y}_m)] \\
&= \frac{\alpha}{\beta} \mathbb{E}_{q(\mathbf{y}_m)} [\log q(\mathbf{y}_m)] \mathbb{E}_{q(\mathbf{f})} [\mu(\mathbf{f})]
\end{aligned}$$

Notice how the last term in  $T_4$  that is  $-\mathbb{E}_Q [\log(M!)]$ , appears with opposite sign in  $T_2 = \mathbb{E}_Q [\log(M!)]$ . This term is thus cancelling out in the computation of the ELBO.

## 2 Performance metrics

We test the algorithms evaluating the  $l_2$  norm to the true intensity function (in the synthetic settings), the test log likelihood ( $\ell_{test}$ ) on the test set and the negative log predicted likelihood (NLPL) on the training set. These metrics are computed as follow:

$$l_2 = \int_{\mathcal{X}} (\lambda(\mathbf{x}) - \bar{\lambda}(\mathbf{x}))^2 d\mathbf{x}$$

where  $\lambda(\mathbf{x})$  is the true intensity function,  $\bar{\lambda}(\mathbf{x})$  is the posterior mean intensity and the integral is evaluated numerically.

Table 1: Synthetic data  $\lambda_1(\mathbf{x})$  - EC performance on training and test dataset. Higher values are better.

|      | $\lambda_1(\mathbf{x})$ - In-sample EC |                       |                       |                       |                       | $\lambda_1(\mathbf{x})$ - Out-of-sample EC |                       |                       |                       |                       |
|------|----------------------------------------|-----------------------|-----------------------|-----------------------|-----------------------|--------------------------------------------|-----------------------|-----------------------|-----------------------|-----------------------|
|      | 10% CI                                 | 20% CI                | 30% CI                | 40% CI                | 50% CI                | 10% CI                                     | 20% CI                | 30% CI                | 40% CI                | 50% CI                |
| STVB | <b>1.00</b><br>(0.00)                  | <b>1.00</b><br>(0.00) | <b>1.00</b><br>(0.00) | <b>1.00</b><br>(0.00) | <b>1.00</b><br>(0.00) | 0.96<br>(0.24)                             | 0.88<br>(0.24)        | <b>0.81</b><br>(0.23) | <b>0.72</b><br>(0.29) | <b>0.60</b><br>(0.29) |
| MFVB | <b>1.00</b><br>(0.00)                  | <b>1.00</b><br>(0.00) | <b>1.00</b><br>(0.00) | <b>1.00</b><br>(0.00) | <b>1.00</b><br>(0.00) | 0.95<br>(0.00)                             | 0.80<br>(0.00)        | 0.76<br>(0.00)        | 0.61<br>(0.00)        | 0.52<br>(0.00)        |
| VBPP | <b>1.00</b><br>(0.00)                  | <b>1.00</b><br>(0.00) | <b>1.00</b><br>(0.00) | <b>1.00</b><br>(0.00) | 0.10<br>(0.30)        | <b>1.00</b><br>(0.00)                      | <b>0.97</b><br>(0.05) | 0.75<br>(0.21)        | 0.41<br>(0.25)        | 0.04<br>(0.09)        |
| SGCP | <b>1.00</b><br>(0.00)                  | <b>1.00</b><br>(0.00) | <b>1.00</b><br>(0.00) | <b>1.00</b><br>(0.00) | 0.60<br>(0.49)        | 0.75<br>(0.29)                             | 0.60<br>(0.33)        | 0.39<br>(0.28)        | 0.27<br>(0.22)        | 0.08<br>(0.12)        |
| LGCP | 0.70<br>(0.46)                         | 0.00<br>(0.00)        | 0.00<br>(0.00)        | 0.00<br>(0.00)        | 0.00<br>(0.00)        | 0.48<br>(0.00)                             | 0.22<br>(0.00)        | 0.08<br>(0.00)        | 0.03<br>(0.00)        | 0.01<br>(0.00)        |

$$\ell_{test} = \mathbb{E}_{q(\lambda^*)q(\mathbf{f})} \left[ \log \left[ \exp \left( - \int_{\mathcal{X}} \lambda(\mathbf{x}) d\mathbf{x} \right) \prod_{\mathbf{x} \in \mathcal{D}_{test}} \lambda(\mathbf{x}) \right] \right]$$

where again the integral is computed via numerical integration.

The NLPL is computed as

$$\text{NLPL} = -\frac{1}{S} \sum_{s=1}^S \log p(N_{\text{train}} | \int_{\mathcal{X}} \lambda^s(\mathbf{x}) d\mathbf{x})$$

where  $S$  denotes the number of samples from the variational distributions  $q(\mathbf{f})$  and  $q(\lambda^*)$ .

Finally, the EC is computed by evaluating the coverage of the CIs of the posterior ( $p(N|\mathcal{D})$ ) and predictive ( $p(N^*|\mathcal{D})$ ). To construct the empirical count distribution we sample from the variational distributions  $q(\mathbf{f})$  and  $q(\lambda^*)$ , obtain samples of  $\lambda(\mathbf{x})$  and simulate  $N$  or  $N^*$  from  $\text{Poisson}(\lambda^* \int_{\mathcal{X}} \sigma(f(\mathbf{x})) d\mathbf{x})$ .

### 3 Additional experimental results

For all comparisons we consider a GP with squared-exponential covariance function with equally set hyperparameters. Denote by  $\theta_i = (l, \sigma_f^2)$  the values of the hyperparameters for the kernel function  $K(\mathbf{x}, \mathbf{x}')$  on  $\lambda_i(\mathbf{x})$  where  $l$  indicates the lengthscale. We set:

- $\theta_1 = (10, 1)$
- $\theta_2 = (0.25, 1)$
- $\theta_3 = (15, 1)$

For the real-world settings we have:

- $\theta_{\text{neuronal data}} = (10, 1)$
- $\theta_{\text{taxi data}} = (0.3, 1)$
- $\theta_{\text{spatio-temporal taxi data}} = (0.3, 1)$

#### 3.1 Synthetic data experiments

In Tab. 1, 2 and 3 we report the values of EC for different CIs and on both the training and test set.

#### 3.2 Real data experiments

In Tab. 4 we report the values of EC for different CIs and on both the training and test set.

Table 2: Synthetic data  $\lambda_2(\mathbf{x})$  - EC performance on training and test dataset. Higher values are better.

|      | $\lambda_2(\mathbf{x})$ - In-sample EC |                       |                       |                       |                       | $\lambda_2(\mathbf{x})$ - Out-of-sample EC |                       |                       |                       |                       |
|------|----------------------------------------|-----------------------|-----------------------|-----------------------|-----------------------|--------------------------------------------|-----------------------|-----------------------|-----------------------|-----------------------|
|      | 10% CI                                 | 20% CI                | 30% CI                | 40% CI                | 50% CI                | 10% CI                                     | 20% CI                | 30% CI                | 40% CI                | 50% CI                |
| STVB | <b>1.00</b><br>(0.00)                  | <b>1.00</b><br>(0.00) | <b>1.00</b><br>(0.00) | <b>1.00</b><br>(0.00) | <b>1.00</b><br>(0.00) | <b>1.00</b><br>(0.00)                      | <b>0.97</b><br>(0.09) | <b>0.91</b><br>(0.24) | <b>0.88</b><br>(0.23) | <b>0.86</b><br>(0.22) |
| MFVB | <b>1.00</b><br>(0.00)                  | <b>1.00</b><br>(0.00) | <b>1.00</b><br>(0.00) | <b>1.00</b><br>(0.00) | <b>1.00</b><br>(0.00) | 0.92<br>(0.00)                             | 0.92<br>(0.00)        | 0.89<br>(0.00)        | 0.84<br>(0.00)        | 0.82<br>(0.00)        |
| VBPP | <b>1.00</b><br>(0.00)                  | <b>1.00</b><br>(0.00) | <b>1.00</b><br>(0.00) | <b>1.00</b><br>(0.00) | 0.10<br>(0.30)        | 0.92<br>(0.24)                             | 0.86<br>(0.23)        | 0.76<br>(0.26)        | 0.45<br>(0.26)        | 0.05<br>(0.05)        |
| SGCP | <b>1.00</b><br>(0.00)                  | 0.90<br>(0.30)        | 0.70<br>(0.46)        | 0.40<br>(0.49)        | 0.30<br>(0.46)        | 0.90<br>(0.00)                             | 0.90<br>(0.00)        | 0.64<br>(0.09)        | 0.14<br>(0.05)        | 0.00<br>(0.00)        |
| LGCP | 0.10<br>(0.30)                         | 0.00<br>(0.00)        | 0.00<br>(0.00)        | 0.00<br>(0.00)        | 0.00<br>(0.00)        | 0.80<br>(0.24)                             | 0.22<br>(0.16)        | 0.04<br>(0.08)        | 0.00<br>(0.00)        | 0.00<br>(0.00)        |

Table 3: Synthetic data  $\lambda_3(\mathbf{x})$  - EC performance on training and test dataset. Higher values are better.

|      | $\lambda_3(\mathbf{x})$ - In-sample EC |                       |                       |                       |                       | $\lambda_3(\mathbf{x})$ - Out-of-sample EC |                       |                       |                       |                       |
|------|----------------------------------------|-----------------------|-----------------------|-----------------------|-----------------------|--------------------------------------------|-----------------------|-----------------------|-----------------------|-----------------------|
|      | 10% CI                                 | 20% CI                | 30% CI                | 40% CI                | 50% CI                | 10% CI                                     | 20% CI                | 30% CI                | 40% CI                | 50% CI                |
| STVB | <b>1.00</b><br>(0.00)                  | <b>1.00</b><br>(0.00) | <b>1.00</b><br>(0.00) | <b>1.00</b><br>(0.00) | <b>1.00</b><br>(0.00) | <b>1.00</b><br>(0.00)                      | <b>1.00</b><br>(0.00) | 0.99<br>(0.00)        | 0.97<br>(0.00)        | 0.92<br>(0.12)        |
| MFVB | <b>1.00</b><br>(0.00)                  | <b>1.00</b><br>(0.00) | <b>1.00</b><br>(0.00) | <b>1.00</b><br>(0.00) | <b>1.00</b><br>(0.00) | <b>1.00</b><br>(0.00)                      | <b>1.00</b><br>(0.00) | 0.97<br>(0.00)        | 0.91<br>(0.00)        | 0.78<br>(0.00)        |
| VBPP | <b>1.00</b><br>(0.00)                  | <b>1.00</b><br>(0.00) | <b>1.00</b><br>(0.00) | <b>1.00</b><br>(0.00) | 0.10<br>(0.30)        | 0.97<br>(0.09)                             | 0.94<br>(0.15)        | 0.83<br>(0.19)        | 0.43<br>(0.14)        | 0.03<br>(0.05)        |
| SGCP | 0.80<br>(0.40)                         | 0.70<br>(0.46)        | 0.50<br>(0.50)        | 0.40<br>(0.49)        | 0.00<br>(0.00)        | 0.82<br>(0.12)                             | 0.54<br>(0.05)        | 0.49<br>(0.03)        | 0.34<br>(0.07)        | 0.02<br>(0.04)        |
| LGCP | <b>1.00</b><br>(0.00)                  | <b>1.00</b><br>(0.00) | <b>1.00</b><br>(0.00) | <b>1.00</b><br>(0.00) | <b>1.00</b><br>(0.00) | <b>1.00</b><br>(0.00)                      | <b>1.00</b><br>(0.00) | <b>1.00</b><br>(0.00) | <b>1.00</b><br>(0.00) | <b>0.95</b><br>(0.00) |

Table 4: Real data. Values are given as In-sample - Out-of-sample EC. Mean and standard errors (in parenthesis) are computed across different seeds.

| Neuronal data |                                  |                                 |                                    |                                    |                                  |
|---------------|----------------------------------|---------------------------------|------------------------------------|------------------------------------|----------------------------------|
|               | 10% EC                           | 20% EC                          | 30% EC                             | 40% EC                             | 50% EC                           |
| STVB          | <b>1.00-1.00</b><br>0.00 - 0.00  | <b>1.00-1.00</b><br>0.00 - 0.00 | <b>1.00-1.00</b><br>0.00-0.00      | <b>0.99-0.56</b><br>(0.10)-(0.50)  | <b>0.01- 0.00</b><br>(0.10)-0.00 |
| MFVB          | <b>1.00-1.00</b><br>0.00 - 0.00  | <b>1.00-0.62</b><br>0.00-(0.49) | <b>1.00-0.03</b><br>0.00-(0.17)    | 0.78-0.00<br>(0.41)-0.00           | 0.00 - 0.00                      |
| VBPP          | <b>1.00-0.53</b><br>0.00-(0.50)  | <b>1.00-0.00</b><br>0.00 - 0.00 | <b>1.00-0.00</b><br>0.00 - 0.00    | 0.83-0.00<br>(0.38)-0.00           | <b>0.01-0.00</b><br>(0.10)-0.00  |
| Taxi data     |                                  |                                 |                                    |                                    |                                  |
|               | 10% EC                           | 20% EC                          | 30% EC                             | 40% EC                             | 50% EC                           |
| STVB          | <b>1.00-1.00</b><br>0.00-0.00    | <b>1.00-1.00</b><br>0.00-0.00   | 0.81- <b>0.37</b><br>(0.39)-(0.48) | 0.09- <b>0.01</b><br>(0.29)-(0.10) | 0.00-0.00                        |
| MFVB          | 0.49-0.93<br>(0.50)-(0.26)       | 0.00-0.13<br>0.00-(0.34)        | 0.00-0.00                          | 0.00-0.00                          | 0.00-0.00                        |
| VBPP          | <b>1.00-0.00</b><br>0.00- (0.00) | <b>1.00-0.00</b><br>0.00-(0.00) | <b>0.98-0.00</b><br>(0.14)-(0.00)  | <b>0.48-0.00</b><br>(0.50)-0.00    | 0.00- 0.00                       |
